## CORRECTION

# Correction: Layout optimization of irregular storage areas under class storage strategy based on clustering and multi-bin size packing problem

Wenbin Zhang, Yuejun Jin, Huarong Zhang, Yiming Wang

The second and third authors' names are spelled incorrectly. The correct names are Yuejun Jin and Huarong Zhang, respectively.

The correct citation is: Zhang W, Jin Y, Zhang H, Wang Y (2024) Layout optimization of irregular storage areas under class storage strategy based on clustering and multi-bin size packing problem. PLoS ONE 19(8): e0307218. <https://doi.org/10.1371/journal.pone.0307218>.

## Reference

1. Zhang W, Jin Y, Zhang R, Wang Y. Layout optimization of irregular storage areas under class storage strategy based on clustering and multi-bin size packing problem. PLoS One. 2024;19(8): e0307218. <https://doi.org/10.1371/journal.pone.0307218> PMID: [39213439](https://pubmed.ncbi.nlm.nih.gov/39213439/)

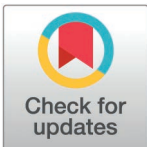

## OPEN ACCESS

**Citation:** Zhang W, Jin Y, Zhang H, Wang Y (2025) Correction: Layout optimization of irregular storage areas under class storage strategy based on clustering and multi-bin size packing problem. PLoS ONE 20(4): e0321787. <https://doi.org/10.1371/journal.pone.0321787>

**Published:** April 2, 2025

**Copyright:** © 2025 Zhang et al. This is an open access article distributed under the terms of the [Creative Commons Attribution License](https://creativecommons.org/licenses/by/4.0/), which permits unrestricted use, distribution, and reproduction in any medium, provided the original author and source are credited.
